# Supplementary material for: A carbazole-containing porphyrinoid: synthesis and oxidation to the porphyrin-state
Source: Royal Society of Chemistry journal article supplement (doi:10.1039/c2cc35550g), 2012-01-01
Supplement: c2cc35550g.pdf [file c2cc35550g.pdf]

## Supporting Information

# A Carbazole-containing Porphyrinoid: Synthesis and Oxidation to the Porphyrin-state

Lena Arnold, Martin Baumgarten and Klaus Müllen\*  
Max-Planck-Institute for Polymer Research, Ackermannweg 10, D-55128 Mainz, Germany

### General Information

Commercially available reagents and solvents were used without further purification unless otherwise stated.  $^1\text{H}$ -NMR and  $^{13}\text{C}$ -NMR spectra were recorded on a Bruker AMX700 in  $\text{THF-d}_8$ , using a 5 mm broadband probe. The experiments were conducted at 298 K and the temperature was regulated by standard  $^1\text{H}$  methanol or glycol NMR samples using the topspin 2.1 software (Bruker). MALDI-TOF spectrometry was conducted on a Bruker Reflex IITOF spectrometer, utilizing a 337 nm nitrogen laser. Tetracyanoquinodimethane (TCNQ) was used as the matrix substance for solid state prepared samples. HRESI mass spectrometry was measured on a QToF Ultima 3 Fa. Micromass/Waters. Solution UV-vis spectra were recorded at room temperature on a Perkin-Elmer Lambda 100 spectrophotometer. Solution photoluminescence spectra were recorded on a SPEX-Fluorolog II(212) spectrometer. Cyclic voltammetry was measured on a Princeton Applied Research Parstat 2273 instrument with anhydrous solvents under argon atmosphere. Melting points were determined on a Büchi hot stage apparatus and are uncorrected.

3,6-Di-*tert*-butyl-1,8-diiodo-9*H*-carbazole<sup>1</sup> (**4**) and 2,5-bis(4,4,5,5-tetramethyl-1,3,2-dioxaborolan-2-yl)-1*H*-pyrrole<sup>2</sup> (**5**) were synthesized following the literature procedures.

### Synthesis of macrocycle **3**

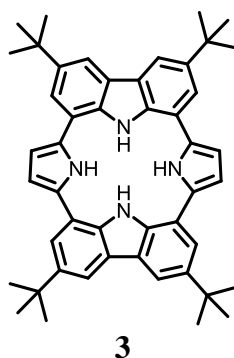

396.4 mg (0.74 mmol, 1 eq) of 3,6-di-*tert*-butyl-1,8-diiodo-9*H*-carbazole (**4**), 239.3 mg (0.81 mmol, 1 eq) of 2,5-bis(4,4,5,5-tetramethyl-1,3,2-dioxaborolan-2-yl)-1*H*-pyrrole (**5**) and 9 mg (5  $\mu\text{mol}$ , 0.01 eq) of  $\text{Pd}(\text{PPh}_3)_4$  were dissolved in toluene (1000 ml). EtOH (400 ml) and 2M  $\text{K}_2\text{CO}_3$  (60 ml, excess) were added to the solution and the reaction mixture was degassed 3 times. The reaction mixture was stirred at 85°C for 17h. The solvents were removed *in vacuo*, the crude was redissolved in EtOAc and filtered over 1 cm silica. The crude product was purified by column chromatography using hexane : EtOAc (3:1) as eluent. Additionally, the crude was suspended in hexane and the precipitated was filtered off to yield 46 mg (0.04 mmol, 10%) of macrocycle **3** as a colourless solid.

Supplementary Material (ESI) for Chemical Communications  
This journal is (c) The Royal Society of Chemistry 2010

$^1\text{H}$ -NMR (THF- $d_8$ , 700 MHz, 298 K):  $\delta$  = 1.53 (s, 36H), 6.73 (d,  $^3J=2.22$  Hz, 4H), 7.72 (d,  $^4J=1.80$  Hz, 4H), 8.07 (t,  $^4J=1.80$  Hz, 4H), 10.53 (s, 2H), 11.13 (s, 2H) ppm.  $^{13}\text{C}$ -NMR (THF- $d_8$ , 176 MHz, 298 K):  $\delta$  = 32.4, 35.4, 109.1, 115.4, 118.6, 122.8, 126.3, 133.8, 136.9, 143.7 ppm.  $^1\text{H}^{15}\text{N}$ -NMR (THF- $d_8$ , 700 MHz, 298 K):  $\delta$  = -231.35 (pyrrole), -271.68 (carbazole) ppm. Mp > 400°C. MALDI TOF (TCNQ as matrix) m/z = 684.36 g/mol - calculated: 684.42 g/mol for  $\text{C}_{48}\text{H}_{52}\text{N}_4$ . HRESI MS (THF 1:1 MeCN):  $[\text{C}_{50}\text{H}_{52}\text{N}_4+\text{H}]^+$  m/z = 685.4290 g/mol - calculated 685.4270 g/mol.

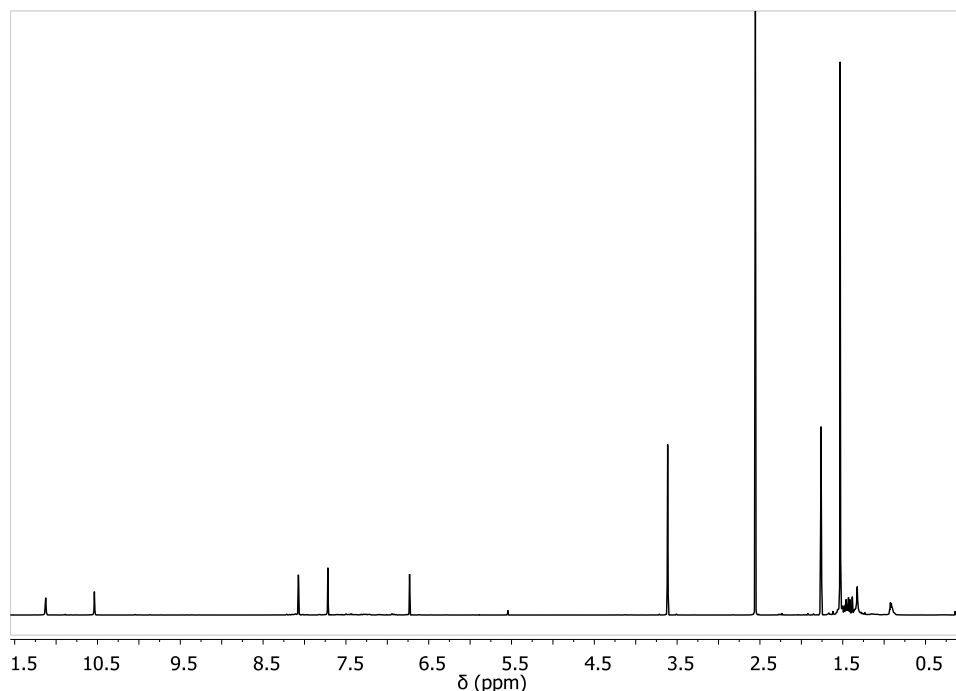

**Fig. S1:**  $^1\text{H}$  NMR spectrum of macrocycle **3** recorded in THF- $d_8$  at 298 K, 700 MHz.

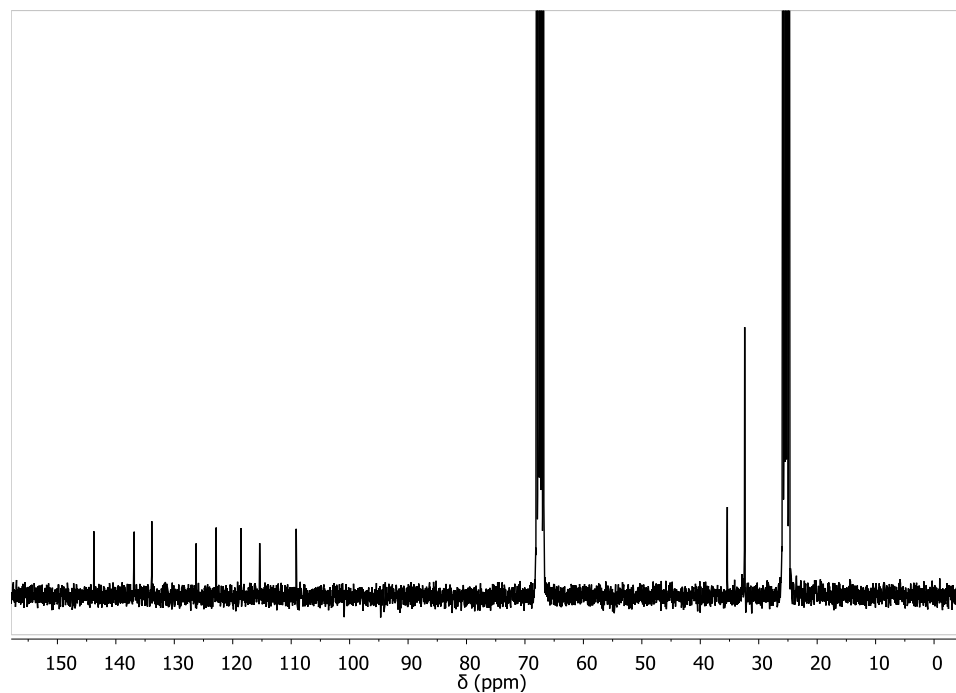

**Fig. S2:**  $^{13}\text{C}$  NMR spectrum of macrocycle **3** recorded in THF- $d_8$  at 298 K, 176 MHz.

Supplementary Material (ESI) for Chemical Communications  
This journal is (c) The Royal Society of Chemistry 2010

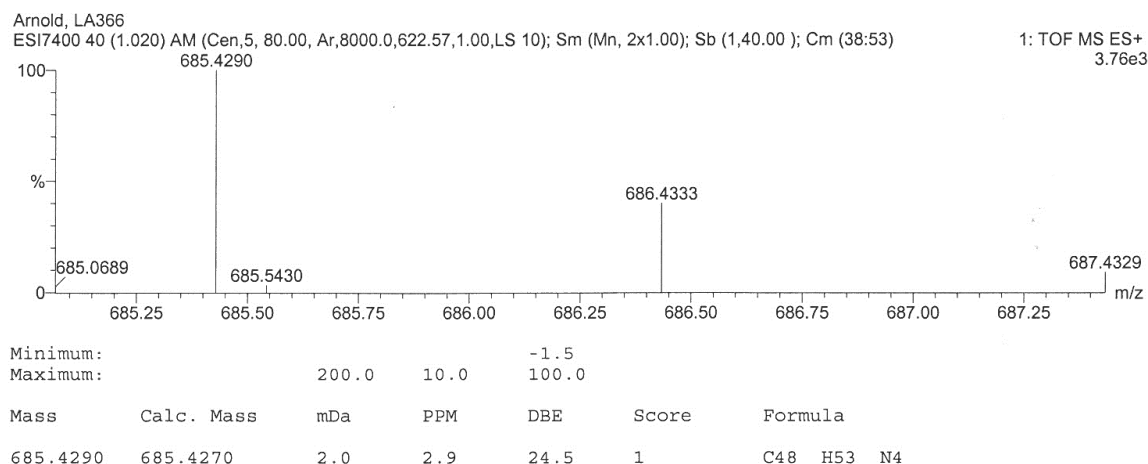

**Fig. S3:** HRESI mass spectrometry macrocycle **3**.

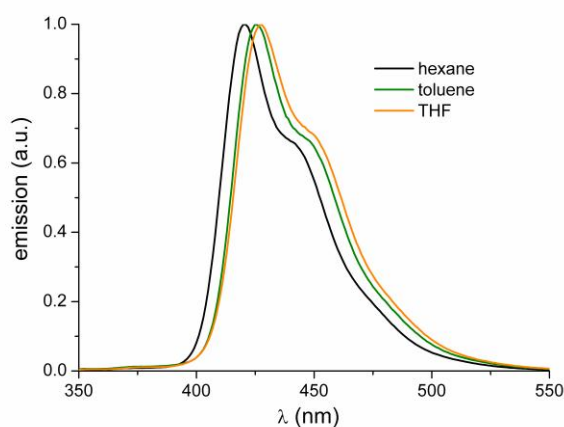

**Fig. S4:** Emission spectra of macrocycle **3** recorded in different solvents.

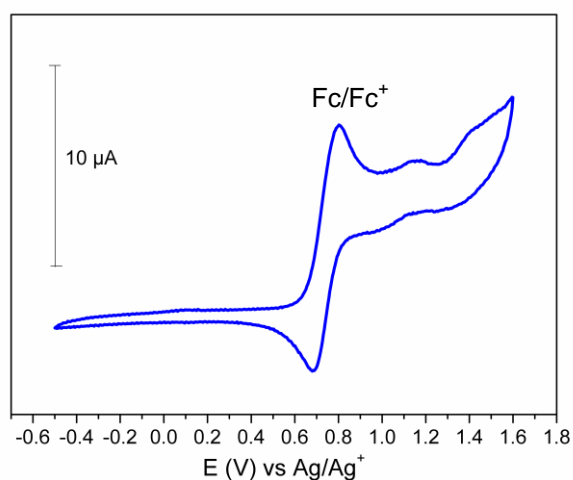

**Fig. S5:** Cyclic voltammogram of macrocycle **3**;  $10^{-3}$  M sample solution in DMF,  $10^{-1}$  M solution of  $n\text{-Bu}_4\text{NPF}_6$  as electrolyte; working and counter electrode: Pt, reference electrode: Ag; ferrocene reference ( $\text{Fc}/\text{Fc}^+$ ).

Supplementary Material (ESI) for Chemical Communications  
 This journal is (c) The Royal Society of Chemistry 2010

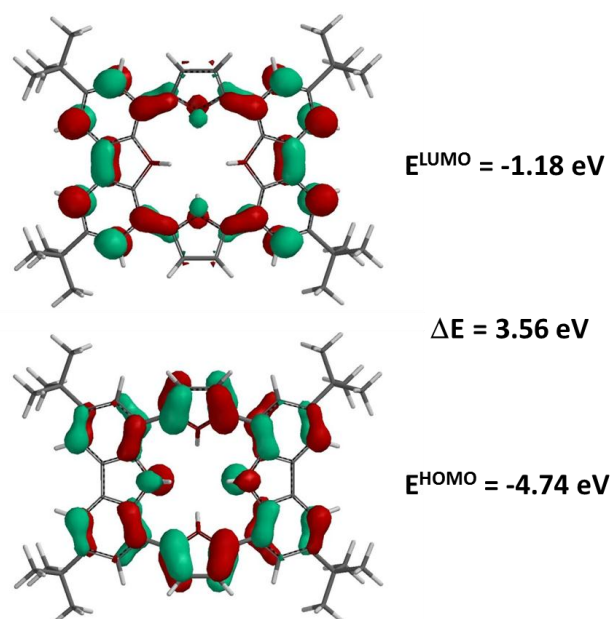

**Fig. S6:** Calculated HOMO, LUMO and LUMO+1 orbital energies of macrocycle **3** at B3LYP/6-31G(d) level of theory using Spartan 4.0 program.<sup>3</sup>

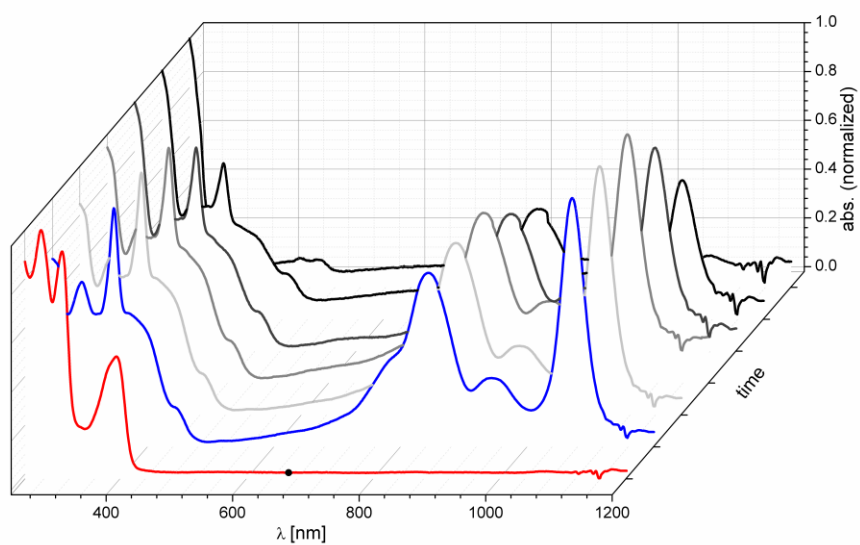

**Fig. S7:** Electronic absorption spectra porphyrinoid **3** (red), porphyrin **2** (blue) in  $\text{CH}_2\text{Cl}_2$  at rt and the stepwise decomposition of the porphyrin species.

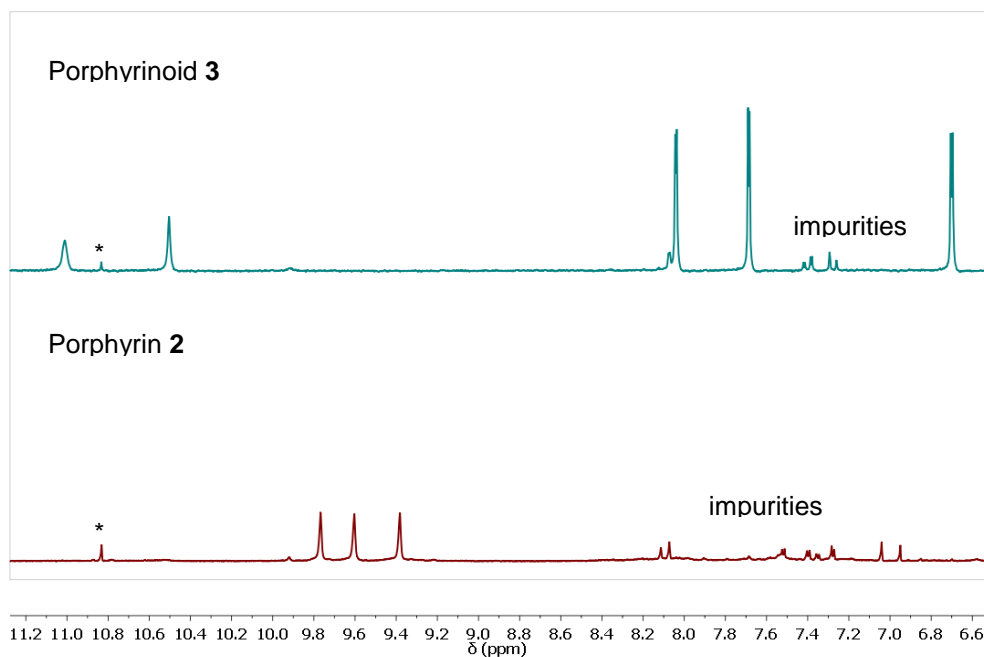

**Fig. S8:** Aromatic region of the <sup>1</sup>H NMR spectra of porphyrinoid **3** (blue) and porphyrin **2** (in THF-d<sub>8</sub>, 700 MHz, 298 K, \*from solvent).

## References

1. M. Inoue, T. Suzuki and M. Nakada, *J. Am. Chem. Soc.*, 2003, **125**, 1140-1141.
2. J. Takagi, K. Sato, J. F. Hartwig, T. Ishiyama and N. Miyaura, *Tetrahedron Lett.*, 2002, **43**, 5649-5651.
3. Karman Ave. Suite 370, Irvine, CA 92612 USA, Spartan version 4.0, Wavefunction, Inc., 18401 edn.
